# Supplementary material
Source: Springer Nature journal article supplement (https://www.springermedizin.de/resource/supplementary/12889_2012_5396_MOESM2_ESM.pdf/9495228)

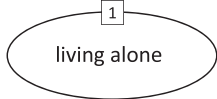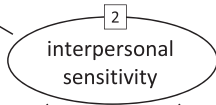

yes

no

high

low

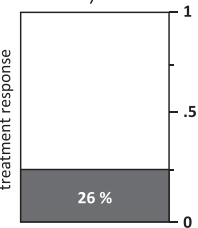

**Subgroup I**  
(*n* = 31)

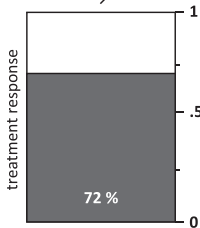

**Subgroup II**  
(*n* = 29)

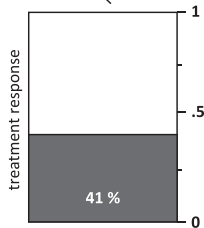

**Subgroup III**  
(*n* = 76)

Supplement: MOESM2 [file 9495228]
